# Supplementary material for: Enhanced Elderberry Snack Bars: A Sensory, Nutritional, and Rheological Evaluation
Source: MDPI journal article supplement (doi:10.3390/foods12193544), 2023-09-23
Supplement: s1 [file s1]

Supplementary table S1. Loss tangent ( $\tan\delta$ ) of oat based snack bars (where 1A - Oat, 1B - Oat + 0.5%EB, 1C - Oat + 1%EB) at 25 °C

|              | 1A       | 1B       | 1C       |
|--------------|----------|----------|----------|
| <b>0.628</b> | 0.369992 | 0.000050 | -        |
| <b>0.769</b> | 0.311900 | 0.277241 | 0.344294 |
| <b>0.943</b> | 0.289936 | 0.271380 | 0.329061 |
| <b>1.16</b>  | 0.275788 | 0.268191 | 0.318929 |
| <b>1.42</b>  | 0.266382 | 0.263400 | 0.312137 |
| <b>1.73</b>  | 0.257241 | 0.259853 | 0.306135 |
| <b>2.13</b>  | 0.251087 | 0.259423 | 0.302588 |
| <b>2.6</b>   | 0.245736 | 0.258176 | 0.297718 |
| <b>3.19</b>  | 0.240923 | 0.258455 | 0.295372 |
| <b>3.91</b>  | 0.239245 | 0.256433 | 0.295014 |
| <b>4.79</b>  | 0.233766 | 0.255834 | 0.293172 |
| <b>5.87</b>  | 0.232781 | 0.256746 | 0.293043 |
| <b>7.19</b>  | 0.229810 | 0.256271 | 0.292549 |
| <b>8.81</b>  | 0.230098 | 0.256520 | 0.293396 |
| <b>10.8</b>  | 0.229398 | 0.257106 | 0.293243 |
| <b>13.2</b>  | 0.226479 | 0.258059 | 0.293845 |
| <b>16.2</b>  | 0.227431 | 0.258944 | 0.294912 |
| <b>19.9</b>  | 0.225794 | 0.259608 | 0.295670 |
| <b>24.3</b>  | 0.226016 | 0.260120 | 0.296532 |
| <b>29.8</b>  | 0.225618 | 0.261159 | 0.298159 |
| <b>36.5</b>  | 0.225416 | 0.262907 | 0.300761 |
| <b>44.8</b>  | 0.224881 | 0.263754 | 0.301447 |
| <b>54.8</b>  | 0.225699 | 0.264664 | 0.303464 |
| <b>67.2</b>  | 0.225414 | 0.266500 | 0.304905 |
| <b>82.3</b>  | 0.226336 | 0.267824 | 0.306052 |
| <b>101</b>   | 0.226481 | 0.269278 | 0.308133 |
| <b>124</b>   | 0.227081 | 0.270463 | 0.309520 |
| <b>151</b>   | 0.227789 | 0.272357 | 0.311978 |
| <b>186</b>   | 0.229638 | 0.274703 | 0.314390 |
| <b>227</b>   | 0.231961 | 0.279479 | 0.318068 |
| <b>279</b>   | 0.231993 | 0.279906 | 0.319585 |
| <b>341</b>   | 0.234717 | 0.282070 | 0.322363 |
| <b>418</b>   | 0.240128 | 0.296016 | 0.330771 |
| <b>513</b>   | 0.292759 | 0.315761 | 0.360697 |
| <b>628</b>   | 0.281519 | 0.328160 | 0.365700 |

Supplementary table S2. Loss tangent ( $\tan\delta$ ) of oat based snack bars (where 1A - Oat, 1B - Oat + 0.5%EB, 1C - Oat + 1%EB) at 35 °C

|       | 1A       | 1B       | 1C       |
|-------|----------|----------|----------|
| 0.628 | 0.000050 | 0.121751 | 0.773524 |
| 0.769 | 0.301006 | 0.308498 | 0.329084 |
| 0.943 | 0.285386 | 0.297369 | 0.316423 |
| 1.16  | 0.271978 | 0.288730 | 0.306522 |
| 1.42  | 0.263583 | 0.281892 | 0.299651 |
| 1.73  | 0.256782 | 0.276552 | 0.294783 |
| 2.13  | 0.251505 | 0.271817 | 0.289971 |
| 2.6   | 0.245608 | 0.269571 | 0.286095 |
| 3.19  | 0.242021 | 0.267402 | 0.286588 |
| 3.91  | 0.239100 | 0.265584 | 0.284380 |
| 4.79  | 0.237104 | 0.265019 | 0.281655 |
| 5.87  | 0.234857 | 0.264374 | 0.282228 |
| 7.19  | 0.233042 | 0.264413 | 0.283662 |
| 8.81  | 0.231595 | 0.265875 | 0.283166 |
| 10.8  | 0.230053 | 0.266345 | 0.283843 |
| 13.2  | 0.229599 | 0.266902 | 0.286286 |
| 16.2  | 0.229111 | 0.268308 | 0.287290 |
| 19.9  | 0.227638 | 0.269134 | 0.287945 |
| 24.3  | 0.228421 | 0.270378 | 0.290578 |
| 29.8  | 0.228351 | 0.272435 | 0.291593 |
| 36.5  | 0.228824 | 0.273858 | 0.293305 |
| 44.8  | 0.228761 | 0.275645 | 0.295619 |
| 54.8  | 0.229040 | 0.277519 | 0.298380 |
| 67.2  | 0.229771 | 0.279708 | 0.300408 |
| 82.3  | 0.230596 | 0.282004 | 0.302368 |
| 101   | 0.231158 | 0.284023 | 0.304618 |
| 124   | 0.232007 | 0.286447 | 0.306936 |
| 151   | 0.232960 | 0.289719 | 0.309909 |
| 186   | 0.234566 | 0.292200 | 0.313261 |
| 227   | 0.238012 | 0.295743 | 0.315869 |
| 279   | 0.239167 | 0.298726 | 0.319274 |
| 341   | 0.239524 | 0.302415 | 0.322967 |
| 418   | 0.246081 | 0.307739 | 0.340917 |
| 513   | 0.280586 | 0.350125 | 0.348082 |
| 628   | 0.283036 | 0.338007 | 0.347765 |

Supplementary table S3. Loss tangent ( $\tan\delta$ ) of oat based snack bars (where 2A - Millet, 2B - Millet + 0.5%EB, 2C - Millet + 1%EB) at 25 °C

|       | 1A       | 1B       | 1C       |
|-------|----------|----------|----------|
| 0.628 | 0.136604 | 0.590531 | 0.000050 |
| 0.769 | 0.214720 | 0.295702 | 0.323275 |
| 0.943 | 0.206485 | 0.297701 | 0.311898 |
| 1.16  | 0.200903 | 0.288798 | 0.303493 |
| 1.42  | 0.198136 | 0.284738 | 0.299184 |
| 1.73  | 0.197724 | 0.280554 | 0.295336 |
| 2.13  | 0.193040 | 0.277681 | 0.292534 |
| 2.6   | 0.191554 | 0.277389 | 0.289415 |
| 3.19  | 0.188790 | 0.274773 | 0.287177 |
| 3.91  | 0.187550 | 0.272242 | 0.288671 |
| 4.79  | 0.186700 | 0.273533 | 0.285456 |
| 5.87  | 0.185553 | 0.272216 | 0.282990 |
| 7.19  | 0.184317 | 0.272780 | 0.283674 |
| 8.81  | 0.184223 | 0.272096 | 0.283099 |
| 10.8  | 0.183563 | 0.272928 | 0.280809 |
| 13.2  | 0.183670 | 0.273723 | 0.282414 |
| 16.2  | 0.183298 | 0.273186 | 0.279888 |
| 19.9  | 0.181603 | 0.275354 | 0.280456 |
| 24.3  | 0.182829 | 0.274326 | 0.280743 |
| 29.8  | 0.180531 | 0.274983 | 0.280461 |
| 36.5  | 0.179489 | 0.275341 | 0.279903 |
| 44.8  | 0.179696 | 0.275567 | 0.279538 |
| 54.8  | 0.178263 | 0.276134 | 0.279383 |
| 67.2  | 0.177952 | 0.276081 | 0.279275 |
| 82.3  | 0.176727 | 0.277069 | 0.279475 |
| 101   | 0.176585 | 0.276705 | 0.278243 |
| 124   | 0.176649 | 0.277610 | 0.277470 |
| 151   | 0.175643 | 0.278300 | 0.276722 |
| 186   | 0.176772 | 0.280936 | 0.280044 |
| 227   | 0.179528 | 0.288595 | 0.287116 |
| 279   | 0.179637 | 0.286928 | 0.283626 |
| 341   | 0.179779 | 0.289801 | 0.283506 |
| 418   | 0.195661 | 0.361554 | 0.415994 |
| 513   | 0.243346 | 0.332902 | 0.309711 |
| 628   | 0.239749 | 0.345305 | 0.333309 |

Supplementary table S4. Loss tangent ( $\tan\delta$ ) of oat based snack bars (where 2A - Millet, 2B - Millet + 0.5%EB, 2C - Millet + 1%EB) at 35 °C

|       | 1A       | 1B       | 1C       |
|-------|----------|----------|----------|
| 0.628 | 0.000050 | 0.000050 | 0.000050 |
| 0.769 | 0.249011 | 0.295784 | 0.362303 |
| 0.943 | 0.239809 | 0.282911 | 0.370865 |
| 1.16  | 0.229478 | 0.264064 | 0.330042 |
| 1.42  | 0.222085 | 0.253949 | 0.313248 |
| 1.73  | 0.217831 | 0.248641 | 0.304978 |
| 2.13  | 0.214171 | 0.244119 | 0.298445 |
| 2.6   | 0.210436 | 0.241071 | 0.295759 |
| 3.19  | 0.208382 | 0.238695 | 0.292388 |
| 3.91  | 0.206587 | 0.236844 | 0.289975 |
| 4.79  | 0.203777 | 0.234501 | 0.287803 |
| 5.87  | 0.203982 | 0.234699 | 0.287426 |
| 7.19  | 0.201954 | 0.232660 | 0.284923 |
| 8.81  | 0.201812 | 0.233448 | 0.286873 |
| 10.8  | 0.201256 | 0.232494 | 0.284666 |
| 13.2  | 0.200743 | 0.232044 | 0.283831 |
| 16.2  | 0.200512 | 0.232987 | 0.286266 |
| 19.9  | 0.201371 | 0.233882 | 0.286595 |
| 24.3  | 0.200307 | 0.233613 | 0.287152 |
| 29.8  | 0.198639 | 0.231978 | 0.285015 |
| 36.5  | 0.199855 | 0.233211 | 0.285829 |
| 44.8  | 0.199251 | 0.232939 | 0.285560 |
| 54.8  | 0.199022 | 0.233250 | 0.286136 |
| 67.2  | 0.199194 | 0.233022 | 0.284728 |
| 82.3  | 0.199572 | 0.233792 | 0.285533 |
| 101   | 0.198750 | 0.233081 | 0.284499 |
| 124   | 0.199443 | 0.233803 | 0.284709 |
| 151   | 0.199630 | 0.233838 | 0.283939 |
| 186   | 0.202425 | 0.236077 | 0.284876 |
| 227   | 0.205464 | 0.239394 | 0.288036 |
| 279   | 0.205280 | 0.238942 | 0.286707 |
| 341   | 0.206624 | 0.240359 | 0.287864 |
| 418   | 0.224836 | 0.298909 | 0.407318 |
| 513   | 0.256764 | 0.278115 | 0.308113 |
| 628   | 0.264546 | 0.288030 | 0.320014 |

Supplementary table S5. Loss tangent ( $\tan\delta$ ) of oat based snack bars (where 2A – Millet2, 2B – Millet2 + 0.5%EB, 2C – Millet2 + 1%EB) at 25 °C

|              | <b>1A</b> | <b>1B</b> | <b>1C</b> |
|--------------|-----------|-----------|-----------|
| <b>0.628</b> | 0.287728  | 0.546190  | 0.000050  |
| <b>0.769</b> | 0.306522  | 0.242640  | 0.260639  |
| <b>0.943</b> | 0.279904  | 0.236919  | 0.252644  |
| <b>1.16</b>  | 0.262976  | 0.230990  | 0.244440  |
| <b>1.42</b>  | 0.249940  | 0.225702  | 0.239526  |
| <b>1.73</b>  | 0.239580  | 0.222164  | 0.235237  |
| <b>2.13</b>  | 0.231976  | 0.219647  | 0.231932  |
| <b>2.6</b>   | 0.224968  | 0.216828  | 0.229164  |
| <b>3.19</b>  | 0.219475  | 0.213975  | 0.226726  |
| <b>3.91</b>  | 0.215511  | 0.213704  | 0.223777  |
| <b>4.79</b>  | 0.211858  | 0.211443  | 0.221829  |
| <b>5.87</b>  | 0.209054  | 0.210995  | 0.221136  |
| <b>7.19</b>  | 0.205916  | 0.209480  | 0.219620  |
| <b>8.81</b>  | 0.202338  | 0.208810  | 0.219937  |
| <b>10.8</b>  | 0.202111  | 0.208120  | 0.218044  |
| <b>13.2</b>  | 0.200200  | 0.207630  | 0.216917  |
| <b>16.2</b>  | 0.197739  | 0.207018  | 0.216050  |
| <b>19.9</b>  | 0.196023  | 0.207372  | 0.216803  |
| <b>24.3</b>  | 0.194874  | 0.206485  | 0.215395  |
| <b>29.8</b>  | 0.193034  | 0.206323  | 0.214711  |
| <b>36.5</b>  | 0.192497  | 0.205135  | 0.214525  |
| <b>44.8</b>  | 0.191835  | 0.204512  | 0.214406  |
| <b>54.8</b>  | 0.189990  | 0.204666  | 0.213865  |
| <b>67.2</b>  | 0.189869  | 0.204119  | 0.213370  |
| <b>82.3</b>  | 0.189168  | 0.204260  | 0.213582  |
| <b>101</b>   | 0.188066  | 0.203681  | 0.212883  |
| <b>124</b>   | 0.187912  | 0.203773  | 0.212906  |
| <b>151</b>   | 0.187781  | 0.204188  | 0.213228  |
| <b>186</b>   | 0.188554  | 0.204825  | 0.215021  |
| <b>227</b>   | 0.189043  | 0.206900  | 0.220474  |
| <b>279</b>   | 0.189402  | 0.206732  | 0.219801  |
| <b>341</b>   | 0.189881  | 0.207597  | 0.223033  |
| <b>418</b>   | 0.192722  | 0.213498  | 0.305462  |
| <b>513</b>   | 0.294569  | 0.272814  | 0.246574  |
| <b>628</b>   | 0.217552  | 0.239137  | 0.251091  |

Supplementary table S6. Loss tangent ( $\tan\delta$ ) of oat based snack bars (where 2A – Millet2, 2B – Millet2 + 0.5%EB, 2C – Millet2 + 1%EB) at 35 °C

|              | <b>1A</b> | <b>1B</b> | <b>1C</b> |
|--------------|-----------|-----------|-----------|
| <b>0.628</b> | 0.846844  | -         | 0.000050  |
| <b>0.769</b> | 0.229164  | 0.286749  | 0.263546  |
| <b>0.943</b> | 0.229086  | 0.275138  | 0.255669  |
| <b>1.16</b>  | 0.225951  | 0.262885  | 0.247965  |
| <b>1.42</b>  | 0.223376  | 0.254595  | 0.241883  |
| <b>1.73</b>  | 0.222127  | 0.248657  | 0.235130  |
| <b>2.13</b>  | 0.221092  | 0.243180  | 0.231530  |
| <b>2.6</b>   | 0.220385  | 0.238381  | 0.229811  |
| <b>3.19</b>  | 0.220332  | 0.233636  | 0.226566  |
| <b>3.91</b>  | 0.220605  | 0.232447  | 0.227913  |
| <b>4.79</b>  | 0.220516  | 0.229617  | 0.222817  |
| <b>5.87</b>  | 0.220842  | 0.228548  | 0.221261  |
| <b>7.19</b>  | 0.221320  | 0.225628  | 0.220275  |
| <b>8.81</b>  | 0.221637  | 0.226422  | 0.221466  |
| <b>10.8</b>  | 0.222894  | 0.224320  | 0.219250  |
| <b>13.2</b>  | 0.223848  | 0.223729  | 0.217215  |
| <b>16.2</b>  | 0.224663  | 0.222998  | 0.219425  |
| <b>19.9</b>  | 0.225733  | 0.223010  | 0.219018  |
| <b>24.3</b>  | 0.226049  | 0.222620  | 0.219483  |
| <b>29.8</b>  | 0.227537  | 0.223079  | 0.218217  |
| <b>36.5</b>  | 0.228970  | 0.223507  | 0.219218  |
| <b>44.8</b>  | 0.230193  | 0.222710  | 0.220146  |
| <b>54.8</b>  | 0.231729  | 0.223861  | 0.220156  |
| <b>67.2</b>  | 0.232907  | 0.223863  | 0.219842  |
| <b>82.3</b>  | 0.234696  | 0.223872  | 0.220624  |
| <b>101</b>   | 0.235650  | 0.224611  | 0.220860  |
| <b>124</b>   | 0.237447  | 0.225200  | 0.222196  |
| <b>151</b>   | 0.239510  | 0.225487  | 0.224594  |
| <b>186</b>   | 0.241981  | 0.228031  | 0.313494  |
| <b>227</b>   | 0.246095  | 0.231165  | 0.238808  |
| <b>279</b>   | 0.247129  | 0.232364  | 0.249816  |
| <b>341</b>   | 0.251014  | 0.232941  | 0.298383  |
| <b>418</b>   | 0.262905  | 0.253448  | 0.274045  |
| <b>513</b>   | 0.309206  | 0.265613  | 0.245087  |
| <b>628</b>   | 0.293829  | 0.261245  | 0.253053  |
